# Supplementary material
Source: publisher figshare collection journal article supplement (https://sage.figshare.com/ndownloader/files/23349710)
Supplement: Supplementary file 1 [file 23349710]

### Supplementary table

Supplementary Table 2. Absolute change of each lipid profiles (analysis was limited to 828 patients who did not take statins at the time of enrollment)

|                           | Baseline  | 3 months  | P value |
|---------------------------|-----------|-----------|---------|
| Total cholesterol (mg/dl) |           |           |         |
| Pitavastatin mono-therapy | 215±36.2  | 161±28.3  | <.0001  |
| Pitavastatin + ezetimibe  | 212±34.1  | 138±26.2  | <.0001  |
| HDL cholesterol (mg/dl)   |           |           |         |
| Pitavastatin mono-therapy | 48.5±13.2 | 48.5±12.4 | 0.97    |
| Pitavastatin + ezetimibe  | 48.0±12.7 | 49.0±11.5 | 0.07    |
| LDL cholesterol (mg/dl)   |           |           |         |
| Pitavastatin mono-therapy | 139±30.0  | 83.3±22.3 | <.0001  |
| Pitavastatin + ezetimibe  | 137±28.7  | 63.0±20.5 | <.0001  |
| Triglyceride (mg/dl)      |           |           |         |
| Pitavastatin mono-therapy | 135±72.7  | 153±98.1  | 0.0001  |
| Pitavastatin + ezetimibe  | 130±66.4  | 130±71.7  | 0.95    |
| EPA (µg/ml)               |           |           |         |
| Pitavastatin mono-therapy | 61.5±33.5 | 70.5±45.9 | <.0001  |
| Pitavastatin + ezetimibe  | 56.6±29.3 | 59.9±39.4 | 0.06    |

|                           |           |           |        |
|---------------------------|-----------|-----------|--------|
| AA (µg/ml)                |           |           |        |
| Pitavastatin mono-therapy | 165±43.5  | 165±44.7  | 0.76   |
| Pitavastatin + ezetimibe  | 165±43.6  | 170±45.6  | 0.006  |
| EPA/AA                    |           |           |        |
| Pitavastatin mono-therapy | 0.40±0.25 | 0.46±0.34 | <.0001 |
| Pitavastatin + ezetimibe  | 0.36±0.20 | 0.37±0.25 | 0.2    |

A total of 412 patients were received pitavastatin mono-therapy and a total of 416 patients were received pitavastatin + ezetimibe therapy

*p*-value refers to the difference between baseline and 3-month follow-up by a paired t-test.

Abbreviations: HDL, high-density lipoprotein; LDL, low-density lipoprotein; EPA, eicosapentaenoic acid; AA, arachidonic acid.

\*Data are expressed as mean ± SD
